# Supplementary material
Source: Elsevier journal article supplement (https://www.sciencedirect.com/science/article/pii/S1579212921000513)
Supplement: mmc1 [file S1579212921000513:mmc1.docx]

# Appendix

Table A1. List of ICD-10 Codes for the Identification of the COPD Patient Population

| ICD-9 Code | Description | Excludes |
| --- | --- | --- |
| **491** | Chronic bronchitis | Excl.: chronic obstructive asthma (493.2) |
| **491.0** | Simple chronic bronchitis  Incl.:  Catarrhal bronchitis, chronic  Smokers' cough |  |
| **491.1** | Mucopurulent chronic bronchitis  Incl.:  Bronchitis (chronic) (recurrent):  Fetid  Mucopurulent  purulent |  |
| **491.2** | Obstructive chronic bronchitis  Incl.:  Bronchitis:  emphysematous  obstructive (chronic) (diffuse)  Bronchitis with:  chronic airway obstruction  emphysema | Excl.: asthmatic bronchitis (acute) (NOS) 493.9; chronic obstructive asthma 493.2 |
| **491.20** | Obstructive chronic bronchitis without exacerbation  Incl.:  Emphysema with chronic bronchitis |  |
| **491.21** | Obstructive chronic bronchitis with (acute) exacerbation  Incl.:  Acute exacerbation of chronic obstructive pulmonary disease [COPD]  Decompensated chronic obstructive pulmonary disease [COPD]  Decompensated chronic obstructive pulmonary disease [COPD] with exacerbation | Excl.: chronic obstructive asthma with acute exacerbation 493.22 |
| **491.22** | Obstructive chronic bronchitis with acute bronchitis |  |
| **491.8** | Other chronic bronchitis  Incl.:  Chronic:  tracheitis  tracheobronchitis |  |
| **491.9** | Unspecified chronic bronchitis |  |
| **492** | Emphysema |  |
| **492.0** | Emphysematous bleb  Incl.:  Giant bullous emphysema  Ruptured emphysematous bleb  Tension pneumatocele  Vanishing lung |  |
| **492.8** | Other emphysema  Incl.:  Emphysema (lung or pulmonary):  NOS  centriacinar  centrilobular  obstructive  panacinar  panlobular  unilateral  vesicular  MacLeod's syndrome  Swyer-James syndrome  Unilateral hyperlucent lung | Excl.: emphysema: with chronic bronchitis (491.20-491.22); compensatory (518.2); due to fumes and vapors (506.4); interstitial (518.1); newborn (770.2); mediastinal (518.1); surgical (subcutaneous) (998.81); traumatic (958.7) |
| **496** | Chronic airway obstruction, not elsewhere classified  Incl.:  Chronic:  nonspecific lung disease  obstructive lung disease  obstructive pulmonary disease [COPD] NOS | Excl.: chronic obstructive lung disease [COPD] specified (as) (with): allergic alveolitis (495.0-495.9); asthma (493.2); bronchiectasis (494.0-494.1); bronchitis (491.20-491.22); with emphysema (491.20-491.22); decompensated (491.21); emphysema (492.0-492.8) |

| ICD-10 code | Description | Excludes |
| --- | --- | --- |
| **J41** | Simple and mucopurulent chronic bronchitis | Excl.:  chronic bronchitis:  NOS (J42)  obstructive (J44.-) |
| **J41.0** | Simple chronic bronchitis |  |
| **J41.1** | Mucopurulent chronic bronchitis |  |
| **J41.8** | Mixed simple and mucopurulent chronic bronchitis |  |
| **J42** | Unspecified chronic bronchitis  Incl.:  Chronic:  bronchitis NOS  tracheitis  tracheobronchitis | Excl.:  chronic:  asthmatic bronchitis (J44.-)  bronchitis:  simple and mucopurulent (J41.-)  with airways obstruction (J44.-)  emphysematous bronchitis (J44.-)  obstructive pulmonary disease NOS (J44.9) |
| **J43** | Emphysema | Excl.:  emphysema:  compensatory (J98.3)  due to inhalation of chemicals, gases, fumes or vapours (J68.4)  interstitial (J98.2)  interstitial  neonatal (P25.0)  mediastinal (J98.2)  surgical (subcutaneous) (T81.8)  traumatic subcutaneous (T79.7)  with chronic (obstructive) bronchitis (J44.-)  emphysematous (obstructive) bronchitis (J44.-) |
| **J43.1** | Panlobular emphysema  Panacinar emphysema |  |
| **J43.2** | Centrilobular emphysema |  |
| **J43.8** | Other emphysema |  |
| **J43.9** | Emphysema, unspecified  Emphysema (lung)(pulmonary):  NOS  bullous  vesicular  Emphysematous bleb |  |
| **J44** | Other chronic obstructive pulmonary disease  Incl.:  chronic:  bronchitis:  asthmatic (obstructive)  emphysematous  with:  airways obstruction  emphysema  obstructive:  asthma  bronchitis  tracheobronchitis | Excl.:  asthma (J45.-)  asthmatic bronchitis NOS (J45.9)  bronchiectasis (J47)  chronic:  tracheitis (J42)  tracheobronchitis (J42)  emphysema (J43.-)  lung diseases due to external agents (J60-J70) |
| **J44.0** | Chronic obstructive pulmonary disease with acute lower respiratory infection | Excl.:  with influenza (J09-J11) |
| **J44.1** | Chronic obstructive pulmonary disease with acute exacerbation, unspecified |  |
| **J44.8** | Other specified chronic obstructive pulmonary disease  Chronic bronchitis:  asthmatic (obstructive) NOS  emphysematous NOS  obstructive NOS | Excl.:  with acute exacerbation (J44.1)  with acute lower respiratory infection (J44.0) |
| **J44.9** | Chronic obstructive pulmonary disease, unspecified Chronic obstructive:  airway disease NOS  lung disease NOS |  |
